# Supplementary material for: Fascin Is Regulated by Slug, Promotes Progression of Pancreatic Cancer in Mice, and Is Associated With Patient Outcomes
Source: PubMed Central journal article supplement — Gastroenterology. 2014 May;146(5):1386–1396.e17. doi: 10.1053/j.gastro.2014.01.046 (PMC4000441; doi:10.1053/j.gastro.2014.01.046), 2014-05
Supplement: mmc7.pdf [file mmc7.pdf]

**Table 1. Multivariate Cox Regression Analysis of Association of Fascin and Clinicopathological Parameters with Overall Survival**

|                                               | Hazard Ratio | 95% CI        | p-value |
|-----------------------------------------------|--------------|---------------|---------|
| Fascin (below v above median histoscore)      | 0.663        | 0.440 – 1.000 | 0.05    |
| T-stage (T2 v T3)                             | 0.572        | 0.309 – 1.059 | 0.076   |
| Grade (low v high)                            | 0.574        | 0.374 – 0.882 | 0.011   |
| Resection margin status (negative v positive) | 0.634        | 0.398 – 1.010 | 0.055   |
| Lymphnode status (negative v positive)        | 0.588        | 0.349 – 0.992 | 0.046   |

NOTE. CI, confidence interval.
