# Supplementary material for: Fascin Is Regulated by Slug, Promotes Progression of Pancreatic Cancer in Mice, and Is Associated With Patient Outcomes
Source: PubMed Central journal article supplement — Gastroenterology. 2014 May;146(5):1386–1396.e17. doi: 10.1053/j.gastro.2014.01.046 (PMC4000441; doi:10.1053/j.gastro.2014.01.046), 2014-05
Supplement: mmc8.pdf [file mmc8.pdf]

**Supplementary Table 2. Percentage of Fascin Positive Lesions in KPC Mice**

| <b>Grade</b>   | <b>Fascin<sup>+</sup><br/>Lesions (%)</b> | <b>Total</b> |
|----------------|-------------------------------------------|--------------|
| <b>PanIN 1</b> | 0                                         | 100          |
| <b>PanIN 2</b> | 0                                         | 70           |
| <b>PanIN 3</b> | 4 (6%)                                    | 65           |
| <b>PDAC</b>    | 20 (100%)                                 | 20           |

Percentage of each type of lesion from KPC mice having at least one fascin positive cell. Data were collected from eight 10w old KPC mice for PanINs and twenty KPC mice with tumours for PDACs
