# Supplementary material for: Fascin Is Regulated by Slug, Promotes Progression of Pancreatic Cancer in Mice, and Is Associated With Patient Outcomes
Source: PubMed Central journal article supplement — Gastroenterology. 2014 May;146(5):1386–1396.e17. doi: 10.1053/j.gastro.2014.01.046 (PMC4000441; doi:10.1053/j.gastro.2014.01.046), 2014-05
Supplement: mmc10.pdf [file mmc10.pdf]

Supplementary Table 4

Clinical spectrum of disease in LSL-KrasG12D/+;LSL-Trp53R172H/+;Pdx1Cre (KPC) and Fascin-/- LSL-KrasG12D/+;LSL-Trp53R172H/+;Pdx1Cre (FKPC) mice.

| ID     | Genotype | Survival (days) | PDAC | Ascites | Bowel invasion | Spleen Invasion | Peritoneal invasion | Diaphragm Mets | Mesenteric Mets | Liver Mets |
|--------|----------|-----------------|------|---------|----------------|-----------------|---------------------|----------------|-----------------|------------|
| 061843 | KPC      | 82              | Y    | Y       | -              | Y               | ND                  | Y              | ND              | Y (M)      |
| 070669 | KPC      | 167             | Y    | Y       | -              | -               | Y                   | -              | ND              | Y (M)      |
| 103996 | KPC      | 118             | Y    | Y       | -              | -               | -                   | Y              | Y               | Y (M)      |
| 104949 | KPC      | 54              | Y    | -       | -              | -               | ND                  | -              | ND              | -          |
| 125115 | KPC      | 69              | Y    | Y       | -              | -               | ND                  | -              | ND              | -          |
| 127445 | KPC      | 77              | Y    | Y       | -              | -               | ND                  | Y              | ND              | Y (m)      |
| 128216 | KPC      | 92              | Y    | Y       | Y              | -               | ND                  | Y              | ND              | -          |
| 128219 | KPC      | 143             | Y    | Y       | Y              | -               | ND                  | Y              | ND              | -          |
| 129694 | KPC      | 140             | Y    | -       | -              | -               | -                   | -              | -               | -          |
| 118739 | KPC      | 236             | Y    | Y       | -              | Y               | -                   | Y              | Y               | Y (M)      |
| 127433 | KPC      | 268             | Y    | Y       | -              | -               | -                   | -              | Y               | Y (M)      |
| 007006 | KPC      | 132             | Y    | Y       | -              | -               | -                   | -              | Y               | -          |
| 134706 | KPC      | 92              | Y    | -       | Y              | -               | -                   | -              | Y               | -          |
| 009642 | KPC      | 97              | Y    | -       | Y              | -               | -                   | -              | Y               | -          |
| 022160 | KPC      | 99              | Y    | Y       | -              | -               | -                   | Y              | Y               | Y (M)      |
| 024900 | KPC      | 94              | Y    | -       | -              | -               | -                   | -              | Y               | Y (M)      |
| 022162 | KPC      | 131             | Y    | Y       | -              | -               | -                   | -              | Y               | -          |
| 028283 | KPC      | 108             | Y    | Y       | Y              | -               | -                   | Y              | Y               | -          |
| 020090 | KPC      | 152             | Y    | Y       | Y              | -               | -                   | -              | Y               | Y (m)      |
| 032329 | KPC      | 94              | Y    | Y       | Y              | Y               | -                   | -              | Y               | Y (M)      |
| 027356 | KPC      | 140             | Y    | Y       | Y              | Y               | -                   | -              | Y               | Y (M)      |
| 032309 | KPC      | 109             | Y    | Y       | -              | -               | Y                   | Y              | Y               | -          |
| 032326 | KPC      | 117             | Y    | Y       | -              | -               | Y                   | -              | Y               | -          |
| 033495 | KPC      | 107             | Y    | Y       | -              | -               | -                   | -              | Y               | -          |
| 032310 | KPC      | 139             | Y    | Y       | -              | -               | -                   | Y              | Y               | Y (M)      |
| 032316 | KPC      | 152             | Y    | Y       | -              | -               | -                   | Y              | Y               | Y (M)      |
| 047000 | KPC      | 101             | Y    | Y       | -              | -               | Y                   | Y              | Y               | Y (M)      |
| 104958 | FKPC     | 95              | Y    | -       | -              | -               | -                   | -              | -               | -          |
| 105768 | FKPC     | 218             | Y    | -       | -              | -               | -                   | -              | ND              | -          |
| 118738 | FKPC     | 205             | Y    | Y       | -              | -               | Y                   | Y              | Y               | Y (M)      |
| 121884 | FKPC     | 126             | Y    | -       | -              | -               | -                   | -              | -               | -          |
| 125098 | FKPC     | 170             | Y    | Y       | Y              | -               | Y                   | Y              | Y               | -          |
| 121531 | FKPC     | 219             | Y    | -       | -              | -               | -                   | -              | -               | -          |
| 127438 | FKPC     | 156             | Y    | Y       | -              | -               | -                   | -              | -               | -          |
| 131681 | FKPC     | 154             | Y    | -       | Y              | -               | -                   | -              | -               | -          |
| 134670 | FKPC     | 164             | Y    | Y       | Y              | -               | -                   | -              | Y               | -          |
| 132762 | FKPC     | 252             | Y    | -       | Y              | -               | -                   | -              | Y               | Y (M)      |
| 006406 | FKPC     | 232             | Y    | -       | -              | -               | -                   | -              | -               | -          |
| 023543 | FKPC     | 127             | Y    | Y       | -              | -               | -                   | -              | Y               | -          |
| 133672 | FKPC     | 276             | Y    | -       | Y              | -               | -                   | -              | -               | Y (M)      |
| 017825 | FKPC     | 182             | Y    | Y       | -              | -               | -                   | -              | Y               | -          |
| 036825 | FKPC     | 97              | Y    | -       | Y              | -               | -                   | -              | Y               | -          |
| 017823 | FKPC     | 189             | Y    | -       | Y              | -               | -                   | -              | Y               | -          |
| 031547 | FKPC     | 138             | Y    | -       | -              | -               | -                   | -              | -               | -          |
| 023536 | FKPC     | 188             | Y    | -       | -              | -               | -                   | -              | Y               | -          |
| 023533 | FKPC     | 193             | Y    | -       | -              | -               | -                   | -              | -               | -          |
| 023532 | FKPC     | 202             | Y    | -       | -              | -               | Y                   | -              | Y               | -          |
| 031524 | FKPC     | 187             | Y    | -       | -              | -               | -                   | -              | -               | -          |
| 031554 | FKPC     | 168             | Y    | Y       | -              | -               | -                   | Y              | Y               | -          |

ND

Not determined

M

Macro metastasis

m

Micro metastasis
